# Supplementary material
Source: MDPI journal article supplement (https://www.mdpi.com/2218-1997/7/6/196)
Supplement: s1 [file s1]

## Supplementary Material

In elaboration of reference [80], there is extensive literature describing single particle inclusive reactions by means of the Tsallis distribution. The 'Tsallis method' is based on a statistical approach that is very different from the framework described in our paper. The Tsallis method posits that the  $p_T$  distribution is a low- $p_T$  exponential that evolves to a power law at high  $p_T$  with terms that are related to thermodynamic quantities. On the other hand, our paper and our earlier results [9–10] find inclusive single particle and jet production in pp and pA collisions to be described quite well by a power law embodied in our A-function, even down to low  $p_T$  and  $\sqrt{s}$ , when expressed in terms of the modified transverse momentum  $P_T$ , demonstrating that hard parton-parton scattering is visible even at low energies.

We have shown the validity of our power law framework in several figures – such as Figures 18, 19 and 22 of this publication. Here, we include another example of our description of the A-function in terms of a power law in the modified transverse momentum,  $P_T$ , with an analysis of the  $K^+$  data taken by the NA49 Collaboration at CERN [49] at  $\sqrt{s} = 17.24$  GeV, roughly  $1.3 \times 10^{-3}$  of the 13 TeV LHC energy scale. These data were included in our Figure 20, showing the  $\Lambda_m - m$  relationship.

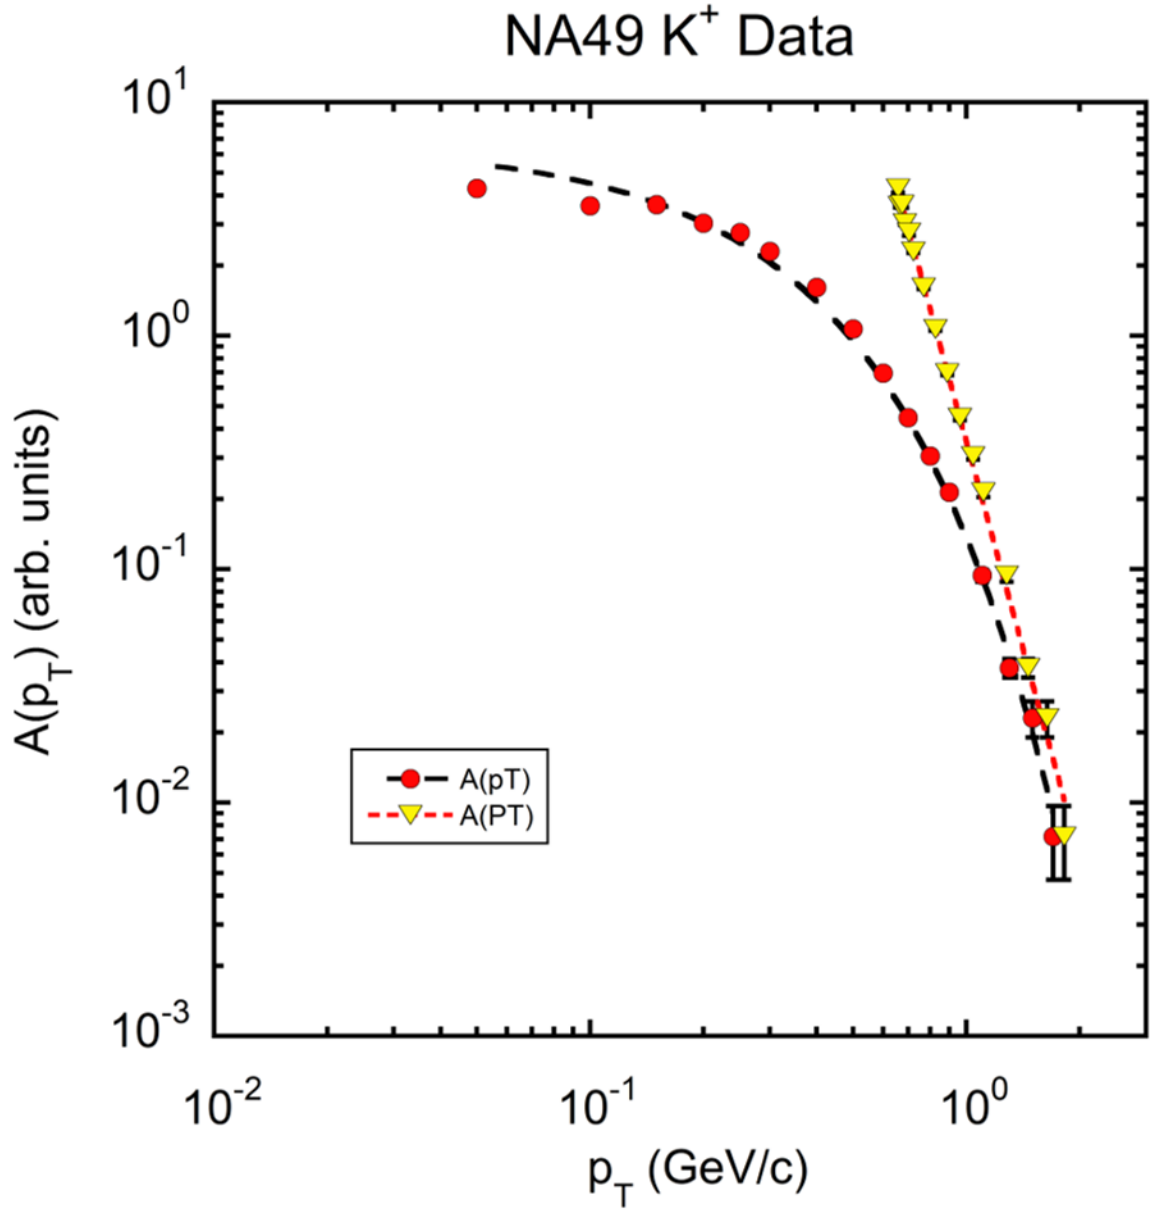

**Figure S1.** Shown is the A-function for  $K^+$  data taken by the NA49 Collaboration at CERN. The A-function is plotted vs.  $p_T$  (red circles) and vs. the modified transverse momentum,  $P_T = \sqrt{p_T^2 + \Lambda_m^2}$  on the same axis. The black dashed line is an exponential fit to the red points ( $\sim \exp(-3.9 p_T)$ ) and the red dashed line is the standard power law fit in the modified transverse momentum  $P_T$ , with  $n_{p_T} = 5.7 \pm 0.2$  and  $\Lambda_m = 0.66 \pm 0.02$  GeV/c.

Note that for low  $p_T$ , of order  $\Lambda_m$  ( $\sim m$ , the mass of the particle detected), we find a power law in the modified transverse momentum  $P_T = \sqrt{p_T^2 + m^2}$ , rather than in  $p_T$ . When this power law spectrum is plotted as a function of  $p_T$  rather than  $P_T$ , it can be roughly be approximated by an exponential for low  $p_T$ . Thus, our formulation offers a natural explanation of the transverse momentum spectrum analyzed by the Tsallis method – namely exponential behavior at low  $p_T$  and a power-law behavior at high  $p_T$  when the modified transverse momentum  $P_T$  becomes approximately equal to  $p_T$ . Further, it is crucial to analyze

the A-function as a power law in the modified  $P_T$  when  $p_T$  of order m. Hence, we have only one behavior – a power law in the modified transverse momentum  $P_T \rightarrow p_T$ .

The key to our method is to separately determine the  $p_T$  dependence of the inclusive invariant cross section by the extrapolation of  $x_R \rightarrow 0$ , which separates ‘hard’ scattering from the ‘soft’ processes of hadronization and fragmentation. Our approach connects observables to the proton PDFs, elementary parton-parton scattering cross sections and a wealth of data gained by lepton-nucleon scattering over the years. In summary, we find no need for statistical concepts to describe the inclusive single particle/jet  $p_T$  - spectra in pp and pA data in two regimes – an exponential behavior at low transverse momentum and a power law at high transverse momentum. However, our framework and the Tsallis approach may be related – especially in heavy ion collisions in the  $[x_R - p_T - \sqrt{s}]$  sector where a multitude of soft physics processes may be described statistically.

See: Tsallis, C. Possible generalization of Boltzmann-Gibbs statistics. J. Stat. Phys. 1988, 52, 479–487, doi:10.1007/bf01016429. and Wilk, G.; Włodarczyk, Z. Power laws in elementary and heavy-ion collisions. Eur. Phys. J. A 2009, 40, 299, doi:10.1140/epja/i2009-10803-9.
